# Supplementary material
Source: Frontiers journal article supplement (https://www.frontiersin.org/articles/306231)
Supplement: Data_Sheet_1.xlsx [file Data_Sheet_1.xlsx]

## Sheet: Original Questions
#	Original survey questions	Region	Researcher	Hydrologist	Ecologist	Practitioner/policy maker	Engineer	Lawyer	Social Scientist	Economist	Other (NGO / advocay)	Other (geomorphologist)
1	How can environmental flows be better integrated into mainstream water resource planning?	Australia/Pacific	x	x
2	How can research outcomes be better targeted or communicated to meet the needs of decision makers?	Australia/Pacific	x	x
3	Can system Failure points be determined? i.e. points of no return	Australia/Pacific	x	x
4	How can sequencing of flow events be better integrated into flow methodologies?	Australia/Pacific	x	x
5	How to balance the trade-off between water usage that has economic values and those services that cannot directly be valued in monetary terms?	Europe	x
6	How to get society to accept that floodplains are the natural conveyors of floodwaters?	Europe	x
7	How the hyporheos contributes to water quality and biodiversity?	Europe	x
8	Enhanced estimation of bedload transport of coarse gravels?	Europe	x
9	How sustainable is the water managmenet	Europe	X		X
10	How resilient is the sustainable water management to changes (cliamte or other)?	Europe	X		X
11	What is the carbon footprint of the water managent (LCA)?	Europe	X		X
12	How can we address the relationship between flow sensitivty and abstractions athte flow regime?	Europe	x	x	x	x
13	How ecological sensitivey can be incorporated into the decision-making?	Europe	x	x	x	x
14	Which factors control flow-ecology relationships?	Europe	x	x	x	x
15	How best to define environmental values of environmental flows at different scales?	Europe	x		x		x
16	How to define complex solutions that are easy to implement?	Europe	x		x		x
17	Qunatitative validation of biological response a[t] different spatial and temporal resolution	Europe	x		x		x
18	Inexpensive but scientifially rigorous method for determination of e-flows	Europe	x		x		x
19	Defining role of hydromorphological patterns and temporal variability	Europe	x		x		x
20	How much water can be extracted [from] rivers without causing unacceptable environmental impacts?	Australia/Pacific	x		x	x
21	As a society what state do we want our aquatic ecosystems to be in?	Australia/Pacific	x		x	x
22	What state (ie.e degree of condition) is acceptable for aquatic ecosytems to function and provide ecosystem services?	Australia/Pacific	x		x	x
23	Do we need stronger legislative support for managing environemtnal aspects of water resources?	Australia/Pacific	x		x	x
24	Integrated land and water management is critical to managing and restoring aquatic ecosystems, so why isnt it widely practised?	Australia/Pacific	x		x	x
25	Who bears the impacts of cliamte change on aquatic ecosystems, the environment, water users or both?	Australia/Pacific	x		x	x
26	Flow-biotic relationships	Australia/Pacific	x			x
27	Basic biology of organisms	Australia/Pacific	x			x
28	Population responses	Australia/Pacific	x			x
29	drivers of social acceptance of [environmental flows]	Australia/Pacific	x			x
30	How can practitioners achieve smaller scale flow/volume delivery but priority ecological outcomes when floodplain landowners block delivery due to concerns about maximum effects, that are rarley to be implemented	Australia/Pacific		x		x	x
31	How can environmental water holders be confident that outer (potentially legally liable) agencies will manage and take strategic risks to allow environmental objectives to be achieved?	Australia/Pacific		x		x	x
32	How can environmental water holders increase specialist tehcnical capacity?	Australia/Pacific		x		x	x
33	How can multiple agencies with overlapping responsibility be rationalised?	Australia/Pacific		x		x	x
34	How can more effective parnerships between environmental agencies and NGOs be facilitated?	Australia/Pacific		x		x	x
35	Implementation challenge will become the challenge of the 21st century	Australia/Pacific	x		x	x
36	Environmetnal flows are positioned as ecological based only, and social-ecological focus needed	Australia/Pacific	x		x	x
37	Industry-manager-community acceptace and ability to implement. Not a scientific question-answer, but a social one, need more social scientists in eflows	Australia/Pacific	x		x	x
38	Adaptive management plans for incorporating eflows into existing WAPs	Australia/Pacific	x		x	x
39	clear quantitative links between aquatic ecology and hydrology	Asia	x	x
40	access to detailed observed hydrological data	Asia	x	x
41	acceptance and reinforcement of environmetnal flow policies nationally	Asia	x	x
42	streamlining environmental flows EXPLICITLY into SDGs	Asia	x	x
43	For regulated (reservoir controlled or weirs), how can we find ways to vary the flow regime to maintain or enhance fish biodiversity?	Europe	x	x	x
44	How can we move the short-term (political cycle associated with elections) driven management of water resoruces and catchments to a long-term integrated approach? How do we get politications to look beyond their own re-election and take water seriously?	Europe	x	x	x
45	In a country where rain and water is assumed to be plentiful, how can we ensure society at large values our freshwater systems and the goods, services and biodiversity they support?	Europe	x	x	x
46	Trying to engage with the media and society at large so that resources are managed strategically raterh than based on recent hazards of [or] disasters?	Europe	x	x	x
47	Definition of e-flows at the river basin scale (within WFD implementation)	Europe	x	x			x
48	Estimation of eflows in termittent rivers	Europe	x	x			x
49	What flows does the environment need?	Europe		x
50	Are most aquatic wildlife populations in rivers doing well or badly?	Europe	x
51	What human activites are causing the greatest pressures on aquatic wildlife?	Europe	x
52	Are chemicals in treated sewage effluent relevant or irrelevant to aquatic wildlife populations?	Europe	x
53	What nutrient pollution concs do we need to attain to imporve river ecology?	Europe	x
54	What is the source of pollution to rivers? I am not convinced that current methodologies give us real answers to this question	Europe	x
55	What emerging contaminants should we be worried about?	Europe	x
56	How will future land use change and climate change affect water resources?	Europe	x
57	How to effectively cap water withdrawals, including both groundwater and surface water	North America				x
58	Politically, how to optimize new dam construction and operation at the basin scale	North America				x
59	How to incentivize millions of individual farmers to restore stremaflow by reducing consumptio, moving diversion points, leasing water, etc.	North America				x
60	Acceptable environmental flow regimes that protect the ecology of river systems	North America	x	x	x		x
61	What is the minimum amount of flow to leave in a river to protect the ecological functions: physical, chemical and biological	North America	x	x	x		x
62	What is the economic value of aquatic resources (sport versus endangered taxa)	North America	x	x	x		x
63	What flow does the ecology need	Europe		x	x	x
64	How does abstraction alter flow and ecological response	Europe		x	x	x
65	How do other pressures (water quality, morphology etc.) interact with flow to alter the ecology	Europe		x	x	x
66	How will ecology alter to climate change, and hence how will the ecological flow need change	Europe		x	x	x
67	How do you upscale and downscale environmenta[l] flow needs with confidence	Europe		x	x	x
68	How the trade offs (for already dedicated users) are to be managed, in an event if E-Flows are maintained	Asia	x			x
69	How to bring in more convincing economic argument in favour of e-flows implementation	Asia	x			x
70	How to make the infrastructure lobby to understand the value of having adequate flows in the river	Asia	x			x
71	Documentation about E-Flows successess regionally (contentent wise) and globally	Asia	x			x
72	How to ensure flows realization in rivers that we save from Water Use Efficiency in irrigation can be	Asia	x			x
73	How do we create legal rights for the environment in planned water?	Australia/Pacific	x			x		x
74	How should environmental water organiztions be more embedded in water resource planning without losing their unique perspective?	Australia/Pacific	x			x		x
75	How can we enhance the indpendence of environemntal water mangers from the poligics of the government of the day?	Australia/Pacific	x			x		x
76	How can Australia strengthen the role of NGO environmental water organisations?	Australia/Pacific	x			x		x
77	How do we build broader, deeper community engagement in and support for environmental flows?	Australia/Pacific	x			x		x
78	How do we get better at reporting on the outcomes of environmental watering?	Australia/Pacific	x			x		x
79	Should environmental water be considered separately to other water uses, or is it fundamentally the same thing?	Australia/Pacific	x			x		x
80	What is an acceptable level of abstraction? This is answered by the following questions [81 - 83]	Europe		x
81	How much water is needed to support a health aquati ecosystem?	Europe		x
82	How is that need influenced by other pressures?	Europe		x
83	How are those needs set in the context of a dynamic hydrologival regime varying on different temporal scales?	Europe		x
84	How can we ensure developing countries have access to best practices (so they don’t have to reinvent the wheel or try and implement too expensive and ill-suited technologies)?	Europe	x	x
85	How can we ensure policy / management follows research recommendations (e.g. max. abstractions)?	Europe	x	x
86	How can we reach sustainable abstraction in regions that are depleting water resources?	Europe	x	x
87	How do we supply water to aquater villages noear [near] energy projects?	North America		x		x
88	What happens when ground water is depleted?	North America		x		x
89	How do we quantify environemntal flows? Negociate? or punt?	North America		x		x
90	How do we develop adaptive appraoches to climate change?	North America		x		x
91	How to implement the appraoches that have been suggested by a great deal of research?	Africa	x	x
92	How to link management of water quantity and qaulity from an environmental perspective?	Africa	x	x
93	How to convince pracitioners that EWM is possible as well as necessary for sustainability?	Africa	x	x
94	There is a need to accept that not all methods are applicable everywhere, there are regional differences associated with many factors including legislation and social systems?	Africa	x	x
95	How to achieve 'buy-in' for EWM principles from the community and encourage self-regulation?	Africa	x	x
96	In the absense of 5 above [question 95] how to police EWM regulation once implemented?	Africa	x	x
97	How do we balance the water needs of people and ecosystems?	Europe	x		x	x
98	How can we optimise the management of river catchments to maintain critical ecosystem services?	Europe	x		x	x
99	How do [to] arrest the decline of aquatic biodiversity-currently faster than in any other ecosystem?	Europe	x		x	x
100	Ecohydrology (linking flow index to aquatic biology)	Europe				x
101	Cost-benefits of eflows	Europe				x
102	Ranking importance of multipressures	Europe				x
103	What are the critical feastures of low flows for biota? Eg depth, velocity, temperature, wetted area	Europe			x
104	Is natural9ised) Q95 the best standard for low flows?	Europe			x
105	How important are high-flow events for variaous environmental features and biota	Europe			x
106	Will we need to recover more environmental water due to climate change / drier outlooks	Australia/Pacific				x
107	How will we recover more environmental water under a drier outlook	Australia/Pacific				x
108	How can we minimise / address the impacts of interception activties such as farm dams and plantations	Australia/Pacific				x
109	How can we address the impacts of increased urban stormwater on urban waterways	Australia/Pacific				x
110	How can we imrpove the management of nof [non] envrionmental water, to meet the environmental objectives	Australia/Pacific				x
111	Can we link environmental flows to biological response? (i.e. we need experimental and demonstration [demonstration] studies to directly show this link)	North America	x	x	x
112	How do we place an economic value on ecosystem services? And thus, how can we place a value on an environmental flow?	North America	x	x	x
113	How do we prioritize variaous environmental services with limited resources? e.g salmon versus biodiversity, floodplain productivity versus fish passage, etc.	North America	x	x	x
114	Quantitative models over spatial-temporal scales to predict ecological responses to flow regime change (natural variation, responses to altered flows and responses to environmental flows)	Australia/Pacific	x
115	Integration of the dynamcs of flow, sediment, thermal and water qaulity dynamics into predictive models and e-flow assessment methodologies	Australia/Pacific	x
116	Integrating the above improvements [questions 114-115] with climate change scenarios	Australia/Pacific	x
117	Development of more flexible and adpative programs for water management nd e-flows decisions and conservation planning	Australia/Pacific	x
118	How to ensure sustainable EF allocations under the cometing water demands?	Africa	x	x			x		x
119	What is the state of groundwater ans in which ways could it be used in augmenting surface water for Eflow requirements?	Africa	x	x			x		x
120	What is the implication of EF allocation to other sectiors such as irrigation and HEP?	Africa	x	x			x		x
121	What levels of irrigation efficencies can ensure sustainable Eflows?	Africa	x	x			x		x
122	Are organisms adapting to altered hydrological and geomorphological regimes? If so how? We assume in our habitat suitability approaches that organisms have preferences that, when not available, permanently diminish tehir performance and success. How true is this?	Africa	x	x		x
123	How can international, national, regional, and local policies be modified to reduce (the pereption of) conflicts between eflows and other water users? How can multiuse objectives be prioritized and valued?	Africa	x	x		x
124	What models of eflows governance exist around the world and what can we larn from them? How do institutional responsbilities vary?	Africa	x	x		x
125	What models/instruments for embeding eflows in impelmention mechanisms are used around the world? How effective are they? Water allocation plans, water ue permits, and operational rules of infrastructure are common instruments for implementation. Are there others?	Africa	x	x		x
126	How can adpative management approaches best be applied to implementation of eflows? What guidelines are best for monitoring to check that eflow social-ecological objectives are being met? How should monitoring programs be deisgned and embedded in broader monitoring?	Africa	x	x		x
127	What is the level of capacity, and schools of thought, for eflow implementation around the world? How can capacity best be developed?	Africa	x	x		x
128	What is the relative importance of flow versus channel morphology in shaping river ecology	Europe				x	x
129	Is there a point at which the level of channel modification makes it inappropriate to consider a biological response to flow?	Europe				x	x
130	Do RIVPACS reference conditions really provide a robust benchmark for a hydrologically unimpacted river macroinvertebrate community	Europe				x	x
131	What alternatives might the scentific community consider to a RIVPACS based approach, that does not rely on hydraulic habitat modelling?	Europe				x	x
132	What factors affect recovery rate from artifical flow alteration?	Europe				x	x
133	What aspects of flow regime alteration most impact ecology?	Europe				x	x
134	Who decides what the restoration or management endpoints shall be?	North America	x	x		x
135	What constitutes a "reference" (or baseline) condition under climate change?	North America	x	x		x
136	How can lessons learned from individual e-flows applications be transferred to other contexts?	North America	x	x		x
137	"How much" restoration can be achieved by flow management alone?	North America	x	x		x
138	Under what contexts is it necessary to include geomorphic (hydraulic) modeling to achieve desired restoration?	North America	x	x		x
139	Under what contexts is it necessary to include thermal modeling to achieve desired restoration?	North America	x	x		x
140	What merits higher management priority: flow regime pattern or extreme flow events?	North America	x	x		x
141	How can at -a-site e-flows paradign be expanded to a whole catchment perspective of conservation where tradeoffs in siting and operation of water infrastructure are explictly evaluated?	North America	x	x		x
142	From a scientific perspective, should e-flows aim for restoration of particular elements (species, ecosystem states) or for adaptation (i.e manage for resilience)	North America	x	x		x
143	How can e-flows for conservation effectively link with human-centric concerns such as water-borne disease and poverty alleviation?	North America	x	x		x
144	How will climate change affect the way that environmental water has been managed into the future?	Australia/Pacific					x
145	How should alternative water sources (treated stormwater/recycled water) be used in the water allocation framework?	Australia/Pacific					x
146	How can monitoring and evaluation continue to improve and adjust to adequetly demonstrate outcomes from watering?	Australia/Pacific					x
147	What's the best way of undertaking multi-year planning in a Victorian context - do we keep the current planning framework, or is there a better way of doing this?	Australia/Pacific					x
148	How will we deal with the food-energy-water-ecosystem nexus?	North America		x		x			x	x
149	How will we improve data availability- especially groundwater?	North America		x		x			x	x
150	How will we ensure that flows for nature are retgurned to the mix (especially in stressed eyars)?	North America		x		x			x	x
151	How to scale up funding for/reinvigorate IWRM & infrastructure (green&grey) for water?	North America		x		x			x	x
152	How do we fund more research and monitoring?	Australia/Pacific					x
153	What are our reginal scale ecological objectives?	Australia/Pacific					x
154	How will climate change affect hydrology?	Australia/Pacific					x
155	How will climate change affect our regional scale ecological objectives?	Australia/Pacific					x
156	Who will make the necessary long-term commitment to engage with traditional owners?	Australia/Pacific					x
157	what is the marginal improvement in biological condition from additional/change in streamflow or water levels (general question to be asked in specific locations)?	North America
158	What is the appropriate scientific framework to assess trade-offs between environmental water prescriptions that have different objectives (e.g. a short-term objective of limiting scour because of impacts to current cohort of juvenile fish versus long-term goal of maintaining fish habitat through geomorphically effective high flows)?	North America
159	what is the time to and duration of responses to prescribed environmental flows/levels?	North America
160	what is the incremental difference in water levels or streamflow from an environmental flow prescription (i.e., did the prescription really change how water was managed?)	North America
161	what are the best methods for determining Ecologically Sustainable Level of Take, SDLs and Environmental Allocations in water resource regions	Australia/Pacific	x			x	x
162	What policy (and legislative) changes are need to better protect (legally) and manage environmental water - particularly 'planned' water?	Australia/Pacific	x			x	x
163	what are the most effective water regime (volume, frequency, duration) required by key environmental assets, and how should we determine these	Australia/Pacific	x			x	x
164	how to determine (and fund) an adequate monitoring, assessment and reporting systems to measure the ecological response of e watering regimes	Australia/Pacific	x			x	x
165	How best to present the community with information on the social, cultural, economic and environmental benefits of environmental watering	Australia/Pacific	x			x	x
166	What changes will be needed as climate change bites and reduces the amount of water available in most catchments	Australia/Pacific	x			x	x
167	what are the key research needs related to environmental water protection and management over the next 10 years	Australia/Pacific	x			x	x
168	what changes to current institutional structures could be made to improve the management of environmental water?	Australia/Pacific	x			x	x
169	Marginal benefit for scalable environmental watering events	Australia/Pacific					x
170	How much is enough' for ensuring recruitment following breeding - how much habitat, food resource, flow etc, how long can juveniles cope between injections of these	Australia/Pacific					x
171	How to sensibly make trade-offs with unequal information	Australia/Pacific					x
172	How will climate change alter river flows?	Australia/Pacific	x	x				x
173	How can environmental risks be equitably shared across jurisdictional or national boundaries?	Australia/Pacific	x	x				x
174	How can decision makers better utilise probabilistic (in contrast to deterministic) modelling outcomes?	Australia/Pacific	x	x				x
175	How can scientists and managers shift public perception on the value of environmental water?	Australia/Pacific	x	x				x
176	Which ecosystems are really groundwater dependent?	Europe	x	x
177	How do we may determine the ecosystems resilience to different issues as climate change, global change, etc?	Europe	x	x
178	How to get a wider concern on groundwater vulnerability and it role in nature?	Europe	x	x
179	How to handle the extrem events in order to control disasters?	Europe	x	x
180	How many water bodies will be able to get a good state under the WFD when there is a high risk to be polluted or altered?	Europe	x	x
181	How can eflow implementation achieve impacts fast enough and at large enough scales?	Europe									x
182	How do we link water allocation to the considerable multi-functional value of ecosystems to provide food and energy, conserve water, sustain livelihoods and contribute to a green economy?	Europe									x
183	What new knowledge and innovative tools do we need on optimising built (eg. dams, levees, irrigation channels) and natural (eg. wetlands, floodplains, watersheds) infrastructure for the purposes of negotiating and implementing water allocations?	Europe									x
184	How do we scale up governance mechanisms that have proved to foster implementation of environmental flows based on negotiated water allocations?	Europe									x
185	How many countries have included environmental water needs into formal legislation? What lessons could be learned from those with legislations?	Europe	x	x	x	x
186	What are the key obstacles of environmental water management, and how to overcome them?	Europe	x	x	x	x
187	How to create an economic and social case for environmental flows?	Europe	x	x	x	x
188	What are the effects of anthropogenic changes to water flows on ecosystems (not just individual, charismatic species)?	North America		x			x
189	How can environmental flows be better integrated into standard river operations practice?	Australia/Pacific				x
190	What are effective long-term water market strategies for environmental water managers seeking to maximise outcomes under uncertainty?	Australia/Pacific				x
191	How can environmental flows be more effectively integrated with other natural resource management activities?	Australia/Pacific				x
192	What are the most effective engagement mechanisms/models for building the social licence for resolving physical constraints associated with floooding impacts on private property?	Australia/Pacific				x
193	value of environmental water in monetary terms	Australia/Pacific		x	x
194	Complete understanding of the water requirements of various species that are targetted for flows	Australia/Pacific		x	x
195	Thresholds for targetted species over extended dry periods	Australia/Pacific		x	x
196	How to assess eflows in data poor environments	Australia/Pacific				x
197	How to undertake quick and cost-effective eflows assessments that still provide sufficiently robust results	Australia/Pacific				x
198	How to demonstrate the social and eocnomic benefits of eflows outweigh the alternatives (e.g. consumptive water use)	Australia/Pacific				x
199	What are the tools and techniques for siting, designing and operating major river infrastructure to maintain or restore downstream environmental flow targets and passage of sediments, nutrients and migratory fish???	North America	x			x		x
200	What level of flow-dependent river health is acceptable? this has to be answered at local stakeholder to state and national policy level	Australia/Pacific	x	x		x
201	What is an acceptable process to arrive at an agreed target level of river health? - as determined by the managed flow regime	Australia/Pacific	x	x		x
202	What is the relationship between flow regime and the measurable relative state of river health. This will vary of course, so needs a method to to apply. Not ELOHA, as the requisote conditions to apply it rarely exist.	Australia/Pacific	x	x		x
203	Developing countries often start the environmental flow discussion by allocating a proportion of annual flow to the environment, with the rest divvied among other users. In this situation, wht is a reasonable proportion considering that 10% is a common starting point?	Australia/Pacific	x	x		x
204	What are the main general ecological objectives of eflow management	Europe	x	x	x		x
205	Can we identify the most important indicators of flow alteration at large scales	Europe	x	x	x		x
206	What are the most general ecological proofs of eflow impacts	Europe	x	x	x		x
207	What water governance is adapted to improved environmental flows	Europe	x	x	x		x
208	How do governments integrate the real value of nature, and its role in water management, into decision making?	Europe	x	x	x				x
209	How can developed nations stop exporting their water demand, through unstainable water foorprints, on developing nations?	Europe	x	x	x				x
210	Are we really ready for the day that demand outstrips supply?	Europe	x	x	x				x
211	Will everyone in the World have access to a clean, reliable water supply in 2050?	Europe		x
212	Will everyone in the World have access to a good level of sanitation in 2050?	Europe		x
213	Can we produce our food and energy requirements, satisfy our waste disposal needs, and protect or improve the environment simultaneously?	Europe		x
214	How can we adapt to climate change to protect and improve the water resource and mitigate against floods and droughts?	Europe		x
215	predictive ecological response to water regime	Australia/Pacific		x
216	lack of monitoring, i.e. what is current condition, what "needs" to be watered	Australia/Pacific		x
217	tradeoff at site scale with limited water availability - which sites to water	Australia/Pacific		x
218	social aspects, env water management is relatively new, and different to historical practices	Australia/Pacific		x
219	quantifying/demonstrating benefits - often trying to assess the difference from a small part of the flow regime	Australia/Pacific		x
220	Is water the limiting factor in the ecological condition of waterways (or is land management/pest management a greater control)?	Australia/Pacific	x
221	What are the effects of temperature changes (caused by climate change) for streams?	Australia/Pacific	x
222	How is environmental water managed to facilitate/encourage/support adaptation?	Australia/Pacific	x
223	How will aquatic and floodplain ecosystems respond to changing hydrological conditions due to climate change?	Europe	x	x
224	How to efficiently implement environmental flow frameworks such as ELOHA into water management practice?	Europe	x	x
225	Are there quantitative region- or river basin-specific between different components of the flow regime and responses of different biota?	Europe	x	x
226	Evidence-based decision making. How do we 'operationalize' evidence-based environmental water management? How do we translate research evidence into the decision-making process?	Australia/Pacific	x		x
227	Extrapolation. How do we extrapolate monitoring and evaluation results from one area to another area that has not been monitored?	Australia/Pacific	x		x
228	Shared benefits. What are the research frameworks that will allow us to identify shared benefits - where water releases can be beneficial for both environmental and consumptive purposes?	Australia/Pacific	x		x
229	Scaling up. We currently assess environmental flow benefits by looking at site-scale data, but know that some species (particularly fish) respond over much larger scales. What are the reseach methods that will allow us to evaluate large-scale responses to environmental flows, and to include these in decision-making?	Australia/Pacific	x		x
230	Complementary works. How can we build complementary works (e.g. habitat restoration, invasive species management) into the evaluation framework for environemntal flows and into decision making for future flows?	Australia/Pacific	x		x
231	How do we overcome the effect of cumulative impacts (at the scale of a watershed) to ensure environmental sustainability?	North America				x
232	How do we maintain key functions and distrbance [disturbance] regimes needed for health freshwater systems - eg energy flows, nutrient processing, sediment flows, flooding.	North America				x
233	How do we create system scale 'protected areas' or 'managed areas' that protect key processes and functions associated with freshwater systems.	North America				x
234	Sediment dynamics	Europe	x
235	Relative importance of biological interactions v flow	Europe	x
236	Real evidence that is the dominant variable in river ecosystems	Europe	x
237	How can the outcomes of environmetnal watering be most cost-effectively measured and communicated?	Australia/Pacific				x
238	How can centralised 'top down' decision making best be integrated with localised 'bottom up' decision in prioritising environmental watering sites?	Australia/Pacific				x
239	The science of environmental watering is fast evolving, with many investors and programs - how can these be harnessed to reduce duplication and get maximum outcomes?	Australia/Pacific				x
240	How can environmental water managers win community 'hearts and minds', in the context of Murray-Darling Basin Plan, drought, climate change and competition for water?	Australia/Pacific				x
241	How should socio-economic benefits be considered in prioritising environmental watering sites?	Australia/Pacific				x
242	Water security for the envrionment	Australia/Pacific		x		x
243	Shared uses	Australia/Pacific		x		x
244	Climate variability	Australia/Pacific		x		x
245	Supporting and monitoring populations	Australia/Pacific		x		x
246	Frameworks and organisations to support management	Australia/Pacific		x		x
247	How much flow is critical for the water environment?	Europe
248	what water levels are critical for wetlands?	Europe
249	can ecology bounce back from droughts?	Europe
250	do hydrological and hydrogeological models reflect reality?	Europe
251	how do we assess whether we're likely to see deterioration in ecology?	Europe
252	how much water is available for abstaction?	Europe
253	How can we better understad and communicate the costs and benefits of different environmental water management options?	Europe	x		x	x
254	How can we engage communities at scale in undertanding and delivery of enivornmental flows?	Europe	x		x	x
255	How can we engage political decision makers and captians of industry so that they have better information about the pros and cons of different river management opions?	Europe	x		x	x
256	How important/necessary is it to coordinate environmental water delivery with natural cues for obtaining good ecological outcomes?	Australia/Pacific		x		x
257	How can e-water managers and holders best coordinate/schedule watering of large off channel floodplain wetland sites (TLM icon sites and new SDL supply-measure projects), to maximise ecological outcomes at the landscape scale whilst minimising potential negative impacts on in-stream outcomes (e.g. reduced fish breeding in the Murray mainstem if too much water is diverted to the floodplain)?	Australia/Pacific		x		x
258	Excessive breeding of carp during environmental watering of large floodplain wetlands sites (using infrastructure, which holds the water on the floodplain for long periods in contrast to water flowing across the floodplain during natural floods) has been identified as having the potential to significantly increase carp populations in the southern connected basin. How can this be avoided in the fu…	Australia/Pacific		x		x
259	Is there any value, from an ecological perspective, in delivering e-water as small to moderate size freshes (i.e. less than 0.5 bankfull) in highly regulated rivers such as the Murrumbidgee? Such flows are currently not targeted by e-water managers due to a belief that the system is too regulated and that there is an absence of habitat features (e.g. benches) for such flows to have any ecological…	Australia/Pacific		x		x
260	How will eflow monitoring go beyond completing score cards to informing strategic management?	Australia/Pacific	x	x		x						x
261	What role does physical habitat play in ecological response?	Australia/Pacific	x	x		x						x
262	How do we best move beyond flow-ecology relationships to hydraulic-ecology relationships?	Australia/Pacific	x	x		x						x
263	Can 2D models adequately predict physical habitat for ecological response and at what scale??	Australia/Pacific	x	x		x						x
264	Are we adequately considering sediment inputs to streams and their role in hindering and enhancing ecological response?	Australia/Pacific	x	x		x						x
265	Why have geomorphic processes and their role in ecosystem response been largely absent from environmental watering implementation and monitoring?	Australia/Pacific	x	x		x						x
266	Drought resilience / planning	Europe		x	x	x
267	Cumulative impacts of infrastructure projects on hydromorphology / ecology of watercourses	Europe		x	x	x
268	Increasing public perceptions of water as are source that has a value and should not be wasted.	Europe		x	x	x

## Sheet: Consolidated questions
Theme	Questions	Relevant Original Questions
Ecological knowledge and environmental flow assessment methods	Can we demonstrate clear quantitative links between the ecology of aquatic species and alterations in hydrology or hydraulics at different spatial and temporal resolutions, and develop appropriate models of these relationships?	12	14	17	26	27	28	39	47	49	60	63	64	81	100	103	104	105	133	114	170	202	206	215	236	245	163	251	261	262	263
	Can we determine ecosystem resilience, and thresholds that lead to a major change in ecological condition (or state) (i.e. can failure points be identified)?	3	20	22	61	177	179	247	248	266
	What is the current condition and biodiversity of our rivers worldwide?	50
	Are organisms adapting to altered hydrological and geomorphological regimes? We assume in our habitat suitability approaches that organisms have preferences that, when not available, permanently diminish their performance and success. How strong is the evidence for this assumption?	66	122	188	223
	What is the time to, and duration of, ecosystem responses to prescribed environmental flows and what factors affect recovery rate from flow alteration?	14	132	159	249
	What is an appropriate reference condition in altered systems (altered through for example climate change, significant channel modification or regulating infrastructure)?	129	137	259
	What is an appropriate flow assessment methodology for an ephemeral stream or intermittent riverstream?	48
	What are the best methods and tools for environmental flow assessments in under-allocated (rather than over-allocated) systems?	130	131
	How should multiple stressors be considered in environmental flow assessments and flows management??	51	52	65	82	102	139	180	220	235	128
	How do we better include the role of temperature and water quality in environmental water assessments and desirable outcomes and how will this change under scenarios of climate change?	7	52	53	54	55	92	115	141	221
	Are we adequately considering sediment inputs to streams and their role in hindering and enhancing ecological response?	264	265	234	19	8	138
	How do we identify and create system-scale protected areas that conserve key processes and functions?	47	67	143	225	232	233
	How do we relate broad scale water management issues with protection of habitat and conservation of biodiversity at local scales?	153	205
	When is it appropriate to transfer eco-hydrological knowledge between river systems? How do we extrapolate monitoring and evaluation outcomes from one area to another area that has not been monitored?	138	227
	What research methods will allow us to use site-scale data to inform large-scale responses to environmental flows, and include these in decision making?	67	225	229
Adaptive management	How do we progress adaptive management processes beyond simply meeting targets towards learning and feedback?	260
	How to determine (and fund and maintain) an adequate monitoring, evaluation, reporting and feedback system within an adaptive management cycle to measure hydrology, hydraulics etc. and the ecological response to environmental flow regimes?	40	78	146	149	152	164	216	237
	How do we operationalize evidence-based environmental water management? How do we translate research evidence into the decision-making processes?	91	226
	How can adaptive management approaches best be applied to implementation of environmental flows? Do the text book approaches suit environmental water management?	38	126
	How do we capture and disseminate the learnings and lessons from ‘informal adaptive management’? How can we legitimize this approach?	78	219
	How do we maintain support and funding to allow the completion (many times) of the adaptive management loop of plan-implement-measure-respond?	38
Integrated management and river objectives	How can environmental flows be better integrated into mainstream water resource planning, flood and drought management, river operations and infrastructure planning, balancing the needs of people and ecosystems?	1	6	43	58	68	70	74	80	86	93	97	117	119	120	121	136	143	145	150	170	189	199	224	267	183
	How can we improve the management of consumptive water to help meet environmental objectives?	43	70	79	98	110	228	243	123
	What changes will be needed to environmental objectives and water allocation frameworks to support environmental water management under climate change? How are climate change risks distributed amongst water users?	10	25	90	106	107	116	144	155	166	214	242	190
	How will water resource availability in both surface water and groundwater systems change into the future (climate change, landuse change, interception), and how will changes in water availability impact environmental water management?	56	88	108	154	172	210	250	176	178
	Should environmental flows be managed for restoration of particular elements (species, processes) or for adaptive potential (i.e. management for ecosystem resilience)?	145	222
	What is the best approach to determining how much water can be sustainably extracted from a river (setting a resource cap)?	57	161	252	89
	How can environmental outcomes be better represented in trade-off decisions where there are different kinds of information about the benefits in economic terms?	5	62	69	101	175	182	187	198	208	241
	How can the costs of providing environmental flows and the benefits of ecosystem services be better quantified to support water allocation decisions?	15	112	170	193	241	253
	How can environmental flows be more effectively integrated with other natural resource management activities, such as riparian restoration and the management of invasive alien species?	24	87	191	231
	How can we build complementary works (e.g. habitat restoration, effects of barriers, invasive species management) into the evaluation framework for environmental flows and future management decisions?	51	230
	How can we better understand and address the impacts of increased urban stormwater on urban waterways?	109
	How do we manage the risk of private property flooding (third party impacts) when providing large events for floodplain inundation?	6	30	192
	How can effective resource caps be implemented where systems are managed across agencies or jurisdictional boundaries?	31	33	173	209
	What is the best approach to assess how well environmental water is allocated and protected through governance arrangements, policy, and legislation?	23	42	72	73	86	89	118	162	184	207	242	246
	How should we embed environmental flows into the food-energy-water-ecosystem nexus, and the Sustainable Development Goals?	11	87	148	211	212	213	143
Knowledge transfer: applying best practice in a global context	What are the best methods and tools for environmental flows assessment and implementation in developing countries?	35	84	94	127	202	203
	How many countries have included environmental water needs into formal legislation and how is this achieved?	9	41	71	185
	What models of environmental water governance exist around the world and what can we learn from them?	33	71	124	168	184	207	246
	What models for embedding environmental flows in water allocation mechanisms are used around the world and how effective are they?	23	71	94	125	160	95
	How can we undertake quick and cost-effective (but still robust) environmental flow assessments in knowledge poor systems?	16	18	84	196	197
	Can a better understanding of ecosystem services contribute to implementation of environmental flows in developing countries?	69	182
	Are there innovate funding mechanisms that can help secure more water for environmental flows and their management?	151
	How do we faciliate a rapid response to the decline of aquatic biodiversity?	99	181
Community knowledge and engagement	How can a more effective partnership between all stakeholders – government, communities, NGOs, and scientists – be developed?	2	13	32	34	37	76	85	91	93	239	255
	How best to build a shared understanding among all stakeholders (including scientists)?	21	41	70	165	175	187	200	218	254	201
	How do we build a broader, deeper community engagement in and support for environmental water?	6	29	36	44	45	59	75	77	95	165	240	268
	How do we communicate concepts of uncertainty and variability in the context of environmental water management and outcomes without undermining public support?	174
	How can centralized ‘top down’ decision making best be integrated with localized ‘bottom up’ decision making in environmental water management?	36	59	75	95	238
	How should the concept of efficiency (i.e. least cost transactions) be balanced with legitimacy (public support and consultation) for environmental water management organizations?	46
	How can indigenous and local knowledge be incorporated into environmental flow visions, planning, implementation and adaptive management?	156
Active management	How can variability and sequencing of flow events and recovery of species be better integrated into environmental flow assessment methodologies?	4	83	147	244
	Can we mimic elements of the natural cycle of variability rather than attempting to optimize across all environmental endpoints in all years?	83	244	256
	What is the marginal improvement in biological conditions from incremental change in stream flow or water level (or from one flow component over another) at different stream locations?	142	157	169	217
	How should ecosystem sensitivity, resilience and recovery rates be incorporated into decision making?	13
	What tools or prioritization process would support decision-making and trade-offs between environmental water regimes that have different objectives (considering also the water preferences of invasive species)?	113	158	217	257	258
	What governance arrangements are suited to the real-time management decisions required for active management?	117
